# Supplementary material
Source: publisher figshare collection journal article supplement (https://frontiersin.figshare.com/ndownloader/files/26083697)
Supplement: Supplementary file 1 [file 26083697]

## Sheet: Sheet1
Sponge	location	date	Volume(ml)	Depth	Host	Phylum	Class	Order	Family	Genus	Species	ind.	guild
25742 29/5/2013	Herzeliya	29/5/13	n/a	Mesophotic	Spongia nitens	Annelida	Polychaeta	Phyllodocida	Nereididae	Ceratonereis (Composetia)	costae	1	Omnivore
25742 29/5/2013	Herzeliya	29/5/13	n/a	Mesophotic	Spongia nitens	Annelida	Polychaeta	Phyllodocida	Nereididae	Ceratonereis (Composetia)	costae	1	Omnivore
26055 30/8/2016	Herzeliya	30/8/16	575	Mesophotic	Ircinia oros	Echinodermata	Ophiuridae	Amphilepidida	Ophiotrichidae	Ophiactis	savignyi	1	Deposit feeder
30.8 Herzeliya 96m I. Oros #30	Herzeliya	30/8/16	2200	Mesophotic	Ircinia oros	Annelida	Polychaeta	Phyllodocida	Nereididae	Ceratonereis (Composetia)	costae	2	Omnivore
30.8 Herzeliya 96m I. Oros #30	Herzeliya	30/8/16	2200	Mesophotic	Ircinia oros	Annelida	Polychaeta	Phyllodocida	Nereididae	Ceratonereis (Composetia)	costae	1	Omnivore
30.8 Herzeliya 96m I. Oros #30	Herzeliya	30/8/16	2200	Mesophotic	Ircinia oros	Annelida	Polychaeta	Phyllodocida	Nereididae	Ceratonereis (Composetia)	costae	1	Omnivore
30.8 Herzeliya 96m I. Oros #30	Herzeliya	30/8/16	2200	Mesophotic	Ircinia oros	Mollusca	Bivalves	Myida	Myidae	Sphenia	binghami	1	Filter feeder
30.8 Herzeliya 96m I. Oros #30	Herzeliya	30/8/16	2200	Mesophotic	Ircinia oros	Mollusca	Bivalves	Myida	Myidae	Sphenia	binghami	1	Filter feeder
30/8/16 Hertzeliya I. oros 19 26063	Herzeliya	30/8/16	4000	Mesophotic	Ircinia oros	Annelida	Polychaeta	Phyllodocida	Nereididae	Ceratonereis (Composetia)	costae	1	Omnivore
30/8/16 Hertzeliya I. oros 19 26063	Herzeliya	30/8/16	4000	Mesophotic	Ircinia oros	Echinodermata	Ophiuridae	Amphilepidida	Ophiotrichidae	Ophiothrix	quinquemaculata	1	Deposit feeder
30/8/16 Hertzeliya I. oros 19 26063	Herzeliya	30/8/16	4000	Mesophotic	Ircinia oros	Echinodermata	Ophiuridae	Amphilepidida	Ophiotrichidae	Ophiothrix	quinquemaculata	2	Deposit feeder
30/8/16 Herzeliya 105m from Stryphnus #28 26072	Herzeliya	30/8/16	5300	Mesophotic	Stryphnus mucronatus	Annelida	Polychaeta	Eunicida	Eunicidae	unident.	unident.	1	Carnivore
30/8/16 Herzeliya 105m from Stryphnus #28 26072	Herzeliya	30/8/16	5300	Mesophotic	Stryphnus mucronatus	Annelida	Polychaeta	Eunicida	Lumbrineridae	Lumbrineris	latreilli	1	Carnivore
30/8/16 Herzeliya 105m from Stryphnus #28 26072	Herzeliya	30/8/16	5300	Mesophotic	Stryphnus mucronatus	Annelida	Polychaeta	Phyllodocida	Nereididae	Ceratonereis (Composetia)	costae	2	Omnivore
30/8/16 Herzeliya 105m from Stryphnus #28 26072	Herzeliya	30/8/16	5300	Mesophotic	Stryphnus mucronatus	Annelida	Polychaeta	Terebellida	Cirratulidae	Dodecaeceria	concharum	1	Deposit feeder
30/8/16 Herzeliya 105m from Stryphnus #28 26072	Herzeliya	30/8/16	5300	Mesophotic	Stryphnus mucronatus	Annelida	Polychaeta	Terebellida	Cirratulidae	unident.	unident.	2	Deposit feeder
30/8/16 Herzeliya 105m from Stryphnus #28 26072	Herzeliya	30/8/16	5300	Mesophotic	Stryphnus mucronatus	Arthropoda	Malacostraca	decapoda	Stenopodidae	Stenopus	spinosus	1	Carnivore
30/8/16 Herzeliya 105m from Stryphnus #28 26072	Herzeliya	30/8/16	5300	Mesophotic	Stryphnus mucronatus	Annelida	Polychaeta	Phyllodocida	Nereididae	Ceratonereis (Composetia)	costae	2	Omnivore
Agelas from Herzeliya 19/4/17	Herzeliya	19/4/17	1800	Mesophotic	Agelas oroides	Annelida	Polychaeta	Sabellida	Sabellidae	Parasabella	tenuicollaris	1	Filter feeder
Agelas from Herzeliya 19/4/17	Herzeliya	19/4/17	1800	Mesophotic	Agelas oroides	Mollusca	Bivalves	Myida	Myidae	Sphenia	binghami	1	Filter feeder
Agelas from Herzeliya 19/4/17 26161	Herzeliya	19/4/17	2395	Mesophotic	Agelas oroides	Annelida	Polychaeta	Phyllodocida	Nereididae	Ceratonereis (Composetia)	costae	1	Omnivore
Agelas from Herzeliya 19/4/17 26161	Herzeliya	19/4/17	2395	Mesophotic	Agelas oroides	Annelida	Polychaeta	Phyllodocida	Nereididae	Ceratonereis (Composetia)	costae	1	Omnivore
Agelas from Herzeliya 19/4/17 26161	Herzeliya	19/4/17	2395	Mesophotic	Agelas oroides	Annelida	Polychaeta	Phyllodocida	Syllidae	Syllis	gracilis	1	Omnivore
Fascciospongia from Sdot Yam 20/9/17 24m	Sedot Yam	20/9/2017	160	Shallow	Fasciospongia cavernosa	Arthropoda	Malacostraca	decapoda	Alpheidae	Synalpheus	gambaralloides	5	Omnivore
Fascciospongia from Sdot Yam 20/9/17 24m	Sedot Yam	20/9/2017	160	Shallow	Fasciospongia cavernosa	Annelida	Polychaeta	Scolecida	Opheliidae	Polypthalmus	pictus	3	Deposit feeder
Fascciospongia from Sdot Yam 20/9/17 24m	Sedot Yam	20/9/2017	160	Shallow	Fasciospongia cavernosa	Annelida	Polychaeta	Scolecida	Opheliidae	Polypthalmus	pictus	1	Deposit feeder
Fasciospongia from sedot Yam 22/5/18	Sedot Yam	22/5/18	100	Shallow	Fasciospongia cavernosa	Annelida	Polychaeta	Phyllodocida	Nereididae	Nereis	cf. rava	1	Omnivore
Fasciospongia from sedot Yam 22/5/18	Sedot Yam	22/5/18	100	Shallow	Fasciospongia cavernosa	Annelida	Polychaeta	Polychaeta	Opheliidae	Polyophthalmus	pictus	2	Deposit feeder
Fasciospongia from sedot Yam 22/5/18	Sedot Yam	22/5/18	100	Shallow	Fasciospongia cavernosa	Annelida	Polychaeta	Polychaeta	Chrysopetalidae	Chrysopetalum	cf. debile	1	Carnivore
Fasciospongia from sedot Yam 24/4/18	Sedot Yam	24/4/18	400	Shallow	Fasciospongia cavernosa	Arthropoda	Malacostraca	decapoda	Alpheidae	Synalpheus	gambaralloides	1	Omnivore
Fasciospongia from sedot Yam 24/4/18	Sedot Yam	24/4/18	400	Shallow	Fasciospongia cavernosa	Arthropoda	Malacostraca	decapoda	Alpheidae	Synalpheus	gambaralloides	14	Omnivore
Fasciospongia from sedot Yam 24/4/18	Sedot Yam	24/4/18	400	Shallow	Fasciospongia cavernosa	Annelida	Sipuncula	unident.	unident.	unident.	unident.	1	Deposit feeder
Fasciospongia from sedot Yam 24/4/18	Sedot Yam	24/4/18	400	Shallow	Fasciospongia cavernosa	Echinodermata	Ophiuridae	Amphilepidida	Amphiuridae	Amphipholis	squamata	1	Deposit feeder
Fasciospongia from sedot Yam 24/4/18	Sedot Yam	24/4/18	400	Shallow	Fasciospongia cavernosa	Annelida	Polychaeta	Phyllodocida	Hesionidae	Syllidia	aramta	3	Carnivore
Fasciospongia from sedot Yam 24/4/18	Sedot Yam	24/4/18	400	Shallow	Fasciospongia cavernosa	Annelida	Polychaeta	Polychaeta	Opheliidae	Polyophthalmus	pictus	1	Deposit feeder
Fasciospongia from sedot Yam 24/4/18	Sedot Yam	24/4/18	400	Shallow	Fasciospongia cavernosa	Annelida	Polychaeta	Phyllodocida	Nereididae	Nereis	rava	3	Omnivore
Fasciospongia from sedot Yam 24/4/18	Sedot Yam	24/4/18	400	Shallow	Fasciospongia cavernosa	Annelida	Polychaeta	Aphroditoidea	Polynoidae	Eunoe	tuerkayi	1	Carnivore
Fasciospongia from sedot Yam 24/4/18	Sedot Yam	24/4/18	400	Shallow	Fasciospongia cavernosa	Annelida	Polychaeta	Polychaeta	Chrysopetalidae	Chrysopetalum	cf. debile	1	Carnivore
Fasciospongia from sedot Yam 24/4/18	Sedot Yam	24/4/18	400	Shallow	Fasciospongia cavernosa	Annelida	Polychaeta	Phyllodocida	Syllidae	Spaerosyllis	sp.	1	Carnivore
Herzeliya 100m 23/3/16 from Stryphnus	Herzeliya	23/3/16	750	Mesophotic	Stryphnus mucronatus	Annelida	Polychaeta	Phyllodocida	Nereididae	Ceratonereis (Composetia)	costae	1	Omnivore
Herzeliya 29/8/16 I. oros #4	Herzeliya	29/8/16	760	Mesophotic	Ircinia oros	Annelida	Polychaeta	Phyllodocida	Syllidae	Trypanosyllis	zebra	1	Carnivore
Herzeliya 29/8/16 I. oros #4	Herzeliya	29/8/16	760	Mesophotic	Ircinia oros	Mollusca	Bivalves	Myida	Myidae	Sphenia	binghami	1	Filter feeder
Herzeliya 29/8/16 I. oros #4	Herzeliya	29/8/16	760	Mesophotic	Ircinia oros	Mollusca	Gastropod	Caenogastropoda	Triphoridae	Monophorus	perversus	1	Carnivore
Herzeliya 30/8/16 from Stryphnus #15 105m 26059	Herzeliya	30/8/16	5500	Mesophotic	Stryphnus mucronatus	Annelida	Polychaeta	Phyllodocida	Nereididae	Ceratonereis (Composetia)	costae	1	Omnivore
Herzeliya 30/8/16 from Stryphnus #15 105m 26059	Herzeliya	30/8/16	5500	Mesophotic	Stryphnus mucronatus	Mollusca	Bivalves	Myida	Myidae	Sphenia	binghami	1	Filter feeder
Herzeliya 30/8/16 from Stryphnus #15 105m 26059	Herzeliya	30/8/16	5500	Mesophotic	Stryphnus mucronatus	Mollusca	Gastropod	Lepetellida	Fissurellidae	Emarginula	adriatica	1	Carnivore
Herzeliya 30/8/16 from Stryphnus #15 105m 26059	Herzeliya	30/8/16	5500	Mesophotic	Stryphnus mucronatus	Annelida	Polychaeta	Phyllodocida	Syllidae	Syllis	gracilis	5	Omnivore
Herzeliya 30/8/16 from Stryphnus #15 105m 26059	Herzeliya	30/8/16	5500	Mesophotic	Stryphnus mucronatus	Annelida	Polychaeta	Terebellida	terebellidae	unident.	unident.	1	Deposit feeder
I. oros 10 from Herzeliya 18/4/17 26132	Herzeliya	18/4/17	600	Mesophotic	Ircinia oros	Annelida	Polychaeta	Phyllodocida	Nereididae	Ceratonereis (Composetia)	costae	1	Omnivore
I. oros 10 from Herzeliya 18/4/17 26132	Herzeliya	18/4/17	600	Mesophotic	Ircinia oros	Mollusca	Bivalves	Myida	Myidae	Sphenia	binghami	1	Filter feeder
I. oros 10 from Herzeliya 30/8/16 26054	Herzeliya	30/8/16	1000	Mesophotic	Ircinia oros	Mollusca	Bivalves	Mytilida	Mytilidae	Gregariella	petagnae	1	Filter feeder
I. oros 15 from Herzeliya 18/4/17 26138	Herzeliya	18/4/17	1250	Mesophotic	Ircinia oros	Annelida	Polychaeta	Phyllodocida	Nereididae	Ceratonereis (Composetia)	costae	2	Omnivore
I. oros 15 from Herzeliya 18/4/17 26138	Herzeliya	18/4/17	1250	Mesophotic	Ircinia oros	Annelida	Polychaeta	Phyllodocida	Syllidae	Trypanosyllis	zebra	1	Carnivore
I. oros 15 from Herzeliya 18/4/17 26138	Herzeliya	18/4/17	1250	Mesophotic	Ircinia oros	Annelida	Polychaeta	Phyllodocida	Nereididae	Ceratonereis (Composetia)	costae	1	Omnivore
I. oros 15 from Herzeliya 18/4/17 26138	Herzeliya	18/4/17	1250	Mesophotic	Ircinia oros	Annelida	Polychaeta	Phyllodocida	Glyceridae	Glycera	sp.	1	Carnivore
I. oros 15 from Herzeliya 18/4/17 26138	Herzeliya	18/4/17	1250	Mesophotic	Ircinia oros	Annelida	Polychaeta	Phyllodocida	Syllidae	Syllis	gracilis	2	Omnivore
I. oros 25955	Ashdod	30/5/11	1600	Mesophotic	Ircinia oros	Annelida	Polychaeta	Phyllodocida	Nereididae	Ceratonereis (Composetia)	costae	1	Omnivore
I. oros 25955	Ashdod	30/5/11	1600	Mesophotic	Ircinia oros	Annelida	Polychaeta	Phyllodocida	Nereididae	Ceratonereis (Composetia)	costae	1	Omnivore
I. oros 25955	Ashdod	30/5/11	1600	Mesophotic	Ircinia oros	Annelida	Polychaeta	Phyllodocida	Nereididae	Ceratonereis (Composetia)	costae	1	Omnivore
I. oros 25955	Ashdod	30/5/11	1600	Mesophotic	Ircinia oros	Annelida	Polychaeta	Phyllodocida	Nereididae	Ceratonereis (Composetia)	costae	1	Omnivore
I. oros 25955	Ashdod	30/5/11	1600	Mesophotic	Ircinia oros	Annelida	Polychaeta	Phyllodocida	Nereididae	Ceratonereis (Composetia)	costae	1	Omnivore
I. oros 25955	Ashdod	30/5/11	1600	Mesophotic	Ircinia oros	Annelida	Polychaeta	Phyllodocida	Nereididae	Ceratonereis (Composetia)	costae	1	Omnivore
I. oros 25955	Ashdod	30/5/11	1600	Mesophotic	Ircinia oros	Annelida	Polychaeta	Phyllodocida	Nereididae	Ceratonereis (Composetia)	costae	1	Omnivore
I. oros 25955	Ashdod	30/5/11	1600	Mesophotic	Ircinia oros	Annelida	Polychaeta	Phyllodocida	Nereididae	Ceratonereis (Composetia)	costae	1	Omnivore
I. oros 25955	Ashdod	30/5/11	1600	Mesophotic	Ircinia oros	Annelida	Polychaeta	Phyllodocida	Nereididae	Ceratonereis (Composetia)	costae	1	Omnivore
I. oros 25955	Ashdod	30/5/11	1600	Mesophotic	Ircinia oros	Annelida	Polychaeta	Phyllodocida	Nereididae	Ceratonereis (Composetia)	costae	1	Omnivore
I. oros 25955	Ashdod	30/5/11	1600	Mesophotic	Ircinia oros	Annelida	Polychaeta	Phyllodocida	Nereididae	Ceratonereis (Composetia)	costae	1	Omnivore
I. oros 25955	Ashdod	30/5/11	1600	Mesophotic	Ircinia oros	Annelida	Polychaeta	Phyllodocida	Nereididae	Leonnates	indicus	1	Omnivore
I. oros 25955	Ashdod	30/5/11	1600	Mesophotic	Ircinia oros	Annelida	Polychaeta	Phyllodocida	Nereididae	Ceratonereis (Composetia)	costae	1	Omnivore
I. oros 25955	Ashdod	30/5/11	1600	Mesophotic	Ircinia oros	Annelida	Polychaeta	Phyllodocida	Nereididae	Ceratonereis (Composetia)	costae	1	Omnivore
I. oros 25955	Ashdod	30/5/11	1600	Mesophotic	Ircinia oros	Mollusca	Bivalves	Myida	Myidae	Sphenia	binghami	1	Filter feeder
I. oros 25955	Ashdod	30/5/11	1600	Mesophotic	Ircinia oros	Mollusca	Bivalves	Nuculanida	Nuculanidae	Saccella	commutate	1	Filter feeder
I. oros 5 from Hertzeliya 120m 17/1/17	Herzeliya	17/1/17	750	Mesophotic	Ircinia oros	Annelida	Polychaeta	Phyllodocida	Nereididae	Ceratonereis (Composetia)	costae	1	Omnivore
I. oros 8 from Herzeliya 18/4/17 26130	Herzeliya	18/4/17	640	Mesophotic	Ircinia oros	Mollusca	Bivalves	Myida	Myidae	Sphenia	binghami	1	Filter feeder
I. oros 8 from Herzeliya 18/4/17 26130	Herzeliya	18/4/17	640	Mesophotic	Ircinia oros	Annelida	Polychaeta	Phyllodocida	Nereididae	Ceratonereis (Composetia)	costae	1	Omnivore
I. oros 8 from Herzeliya 18/4/17 26130	Herzeliya	18/4/17	640	Mesophotic	Ircinia oros	Annelida	Polychaeta	Aphroditoidea	Polynoidae	Eunoe	tuerkayi	1	Carnivore
I. oros 8 from Herzeliya 18/4/17 26130	Herzeliya	18/4/17	640	Mesophotic	Ircinia oros	Annelida	Polychaeta	Terebellida	terebellidae	unident.	unident.	1	Deposit feeder
I. oros 8 from Herzeliya 18/4/17 26130	Herzeliya	18/4/17	640	Mesophotic	Ircinia oros	Echinodermata	Ophiuridae	Amphilepidida	Ophiotrichidae	Ophiactis	savignyi	1	Deposit feeder
I. variabilis 15 from Herzeliya 1/10/17	Herzeliya	2017-01-10	2500	Mesophotic	Ircinia variabilis	Annelida	Polychaeta	Phyllodocida	Nereididae	Ceratonereis (Composetia)	costae	8	Omnivore
I. variabilis 15 from Herzeliya 1/10/17	Herzeliya	2017-01-10	2500	Mesophotic	Ircinia variabilis	Annelida	Polychaeta	Phyllodocida	Nereididae	Ceratonereis (Composetia)	costae	1	Omnivore
I. variabilis 15 from Herzeliya 1/10/17	Herzeliya	2017-01-10	2500	Mesophotic	Ircinia variabilis	Annelida	Polychaeta	Phyllodocida	Nereididae	Ceratonereis (Composetia)	costae	1	Omnivore
I. variabilis 15 from Herzeliya 1/10/17	Herzeliya	2017-01-10	2500	Mesophotic	Ircinia variabilis	Annelida	Polychaeta	Phyllodocida	Nereididae	Ceratonereis (Composetia)	costae	1	Omnivore
I. variabilis 15 from Herzeliya 1/10/17	Herzeliya	2017-01-10	2500	Mesophotic	Ircinia variabilis	Annelida	Polychaeta	Phyllodocida	Nereididae	Ceratonereis (Composetia)	costae	1	Omnivore
I. variabilis 15 from Herzeliya 1/10/17	Herzeliya	2017-01-10	2500	Mesophotic	Ircinia variabilis	Annelida	Polychaeta	Phyllodocida	Nereididae	Ceratonereis (Composetia)	costae	1	Omnivore
I. variabilis 15 from Herzeliya 1/10/17	Herzeliya	2017-01-10	2500	Mesophotic	Ircinia variabilis	Annelida	Polychaeta	Phyllodocida	Nereididae	Ceratonereis (Composetia)	costae	1	Omnivore
I. variabilis 15 from Herzeliya 1/10/17	Herzeliya	2017-01-10	2500	Mesophotic	Ircinia variabilis	Annelida	Sipuncula	unident.	unident.	unident.	unident.	1	Deposit feeder
I. variabilis 15 from Herzeliya 1/10/17	Herzeliya	2017-01-10	2500	Mesophotic	Ircinia variabilis	Echinodermata	Ophiuridae	Amphilepidida	Ophiotrichidae	Ophiothrix	quinquemaculata	1	Deposit feeder
I. variabilis 25918	Herzeliya	28/7/15	500	Mesophotic	Ircinia variabilis	Annelida	Polychaeta	Phyllodocida	Nereididae	Ceratonereis (Composetia)	costae	1	Omnivore
I. variabilis from Sdot Yam 20/9/17 24m	Sedot Yam	20/9/2017	100	Shallow	Ircinia variabilis	Arthropoda	Malacostraca	decapoda	Alpheidae	Synalpheus	gambaralloides	1	Omnivore
I. variabilis from Sdot Yam 20/9/17 24m	Sedot Yam	20/9/2017	100	Shallow	Ircinia variabilis	Echinodermata	Ophiuridae	Amphilepidida	Ophiotrichidae	Ophiactis	savignyi	1	Deposit feeder
I. variabilis from Sedot Tam 21/8/2017	Sedot Yam	21/8/2017	240	Shallow	Ircinia variabilis	Annelida	Polychaeta	Phyllodocida	Nereididae	Leonnates	indicus	3	Omnivore
I. variabilis from Sedot Tam 21/8/2017	Sedot Yam	21/8/2017	240	Shallow	Ircinia variabilis	Arthropoda	Malacostraca	decapoda	Alpheidae	Synalpheus	gambaralloides	3	Omnivore
I. variabilis from Sedot Yam 28/11/2017 27m	Sedot Yam	28/11/2017	350	Shallow	Ircinia variabilis	Arthropoda	Malacostraca	decapoda	Alpheidae	Synalpheus	gambaralloides	12	Omnivore
Ircinia oros 10 from Herzeliya 110m 3/7/2017	Herzeliya	2017-03-07	700	Mesophotic	Ircinia oros	Echinodermata	Ophiuridae	Amphilepidida	Ophiotrichidae	Ophiactis	savignyi	14	Deposit feeder
Ircinia oros 10 from Herzeliya 110m 3/7/2017	Herzeliya	2017-03-07	700	Mesophotic	Ircinia oros	Annelida	Polychaeta	Phyllodocida	Nereididae	Ceratonereis (Composetia)	costae	1	Omnivore
Ircinia oros 13 from Herzeliya 110m 3/7/2017	Herzeliya	2017-03-07	320	Mesophotic	Ircinia oros	Annelida	Polychaeta	Phyllodocida	Nereididae	Ceratonereis (Composetia)	costae	1	Omnivore
Ircinia oros 13 from Herzeliya 110m 3/7/2017	Herzeliya	2017-03-07	320	Mesophotic	Ircinia oros	Echinodermata	Ophiuridae	Amphilepidida	Ophiotrichidae	Ophiactis	savignyi	2	Deposit feeder
Ircinia oros 18 from Herzliya 110m 3/7/2017	Herzeliya	2017-03-07	2400	Mesophotic	Ircinia oros	Annelida	Polychaeta	Phyllodocida	Nereididae	Ceratonereis (Composetia)	costae	3	Omnivore
Ircinia oros 18 from Herzliya 110m 3/7/2017	Herzeliya	2017-03-07	2400	Mesophotic	Ircinia oros	Annelida	Polychaeta	Phyllodocida	Nereididae	Ceratonereis (Composetia)	costae	2	Omnivore
Ircinia oros 18 from Herzliya 110m 3/7/2017	Herzeliya	2017-03-07	2400	Mesophotic	Ircinia oros	Annelida	Polychaeta	Terebellida	terebellidae	unident.	unident.	1	Deposit feeder
Ircinia oros 18 from Herzliya 110m 3/7/2017	Herzeliya	2017-03-07	2400	Mesophotic	Ircinia oros	Arthropoda	Malacostraca	decapoda	Pulminidae	Pilumnus	spinifer	1	Omnivore
Ircinia oros 21 from Herzeliya 110m 4/7/2017	Herzeliya	2017-04-07	2400	Mesophotic	Ircinia oros	Annelida	Polychaeta	Phyllodocida	Nereididae	Ceratonereis (Composetia)	costae	6	Omnivore
Ircinia oros 21 from Herzeliya 110m 4/7/2017	Herzeliya	2017-04-07	2400	Mesophotic	Ircinia oros	Annelida	Polychaeta	Phyllodocida	Nereididae	Ceratonereis (Composetia)	costae	1	Omnivore
Ircinia oros 21 from Herzeliya 110m 4/7/2017	Herzeliya	2017-04-07	2400	Mesophotic	Ircinia oros	Annelida	Polychaeta	Phyllodocida	Nereididae	Ceratonereis (Composetia)	costae	1	Omnivore
Ircinia oros from Herzeliya	Herzeliya	29/8/2016	640	Mesophotic	Ircinia oros	Arthropoda	Malacostraca	decapoda	Alpheidae	Synalpheus	gambaralloides	1	Omnivore
Ircinia oros from Herzeliya	Herzeliya	29/8/2016	640	Mesophotic	Ircinia oros	Arthropoda	Malacostraca	decapoda	Alpheidae	Synalpheus	gambaralloides	1	Omnivore
Ircinia oros from Herzeliya	Herzeliya	29/8/2016	640	Mesophotic	Ircinia oros	Arthropoda	Malacostraca	decapoda	Alpheidae	Synalpheus	gambaralloides	1	Omnivore
Ircinia oros from Herzeliya	Herzeliya	29/8/2016	640	Mesophotic	Ircinia oros	Annelida	Polychaeta	Polychaeta	Nereididae	Ceratonereis (Composetia)	costae	1	Omnivore
Ircinia oros from Herzliya 23/3/2018 96m	Herzeliya	23/3/2018	740	Mesophotic	Ircinia oros	Annelida	Polychaeta	Polychaeta	Nereididae	Ceratonereis (Composetia)	costae	2	Omnivore
Ircinia oros from Herzliya 23/3/2018 96m	Herzeliya	23/3/2018	740	Mesophotic	Ircinia oros	Annelida	Polychaeta	Polychaeta	Syllidae	Syllis	gracilis	1	Omnivore
Ircinia sp. (44) from herzeliya 19/4/17 26165	Herzeliya	19/4/17	1500	Mesophotic	Ircinia variabilis	Annelida	Polychaeta	Phyllodocida	Nereididae	Ceratonereis (Composetia)	costae	1	Omnivore
Ircinia sp. (44) from herzeliya 19/4/17 26165	Herzeliya	19/4/17	1500	Mesophotic	Ircinia variabilis	Annelida	Polychaeta	Phyllodocida	Nereididae	Ceratonereis (Composetia)	costae	4	Omnivore
Ircinia sp. (44) from herzeliya 19/4/17 26165	Herzeliya	19/4/17	1500	Mesophotic	Ircinia variabilis	Annelida	Polychaeta	Phyllodocida	Nereididae	Ceratonereis (Composetia)	costae	1	Omnivore
Ircinia sp. (44) from herzeliya 19/4/17 26165	Herzeliya	19/4/17	1500	Mesophotic	Ircinia variabilis	Mollusca	Bivalves	Myida	Myidae	Sphenia	binghami	1	Filter feeder
Ircinia sp. (44) from herzeliya 19/4/17 26165	Herzeliya	19/4/17	1500	Mesophotic	Ircinia variabilis	Annelida	Polychaeta	Phyllodocida	Nereididae	Leonnates	indicus	1	Omnivore
Ircinia sp. (44) from herzeliya 19/4/17 26165	Herzeliya	19/4/17	1500	Mesophotic	Ircinia variabilis	Annelida	Polychaeta	Phyllodocida	Nereididae	Ceratonereis (Composetia)	costae	1	Omnivore
Ircinia sp. (44) from herzeliya 19/4/17 26165	Herzeliya	19/4/17	1500	Mesophotic	Ircinia variabilis	Annelida	Polychaeta	Terebellida	Terebellidae	unident.	unident.	1	Deposit feeder
Ircinia sp. (44) from herzeliya 19/4/17 26165	Herzeliya	19/4/17	1500	Mesophotic	Ircinia variabilis	Echinodermata	Ophiuridae	Amphilepidida	Amphiuridae	Amphipholis	squamata	2	Deposit feeder
Ircinia variabilis 2 from Rosh Carmel 27/9/2017 120m	Haifa –Rosh Carmel	27/9/2017	400	Mesophotic	Ircinia variabilis	Annelida	Polychaeta	Phyllodocida	Nereididae	Ceratonereis (Composetia)	costae	2	Omnivore
Ircinia variabilis 2 from Rosh Carmel 27/9/2017 120m	Haifa –Rosh Carmel	27/9/2017	400	Mesophotic	Ircinia variabilis	Annelida	Polychaeta	Phyllodocida	Nereididae	Ceratonereis (Composetia)	costae	2	Omnivore
Ircinia variabilis 2 from Rosh Carmel 27/9/2017 120m	Haifa –Rosh Carmel	27/9/2017	400	Mesophotic	Ircinia variabilis	Echinodermata	Ophiuridae	Amphilepidida	Ophiotrichidae	Ophiactis	savignyi	4	Deposit feeder
Ircinia variabilis 2 from Rosh Carmel 27/9/2017 120m	Haifa –Rosh Carmel	27/9/2017	400	Mesophotic	Ircinia variabilis	Mollusca	Bivalves	Mytilida	Mytilidae	Gregariella	petagnae	2	Filter feeder
Ircinia variabilis 2 from Rosh Carmel 27/9/2017 120m	Haifa –Rosh Carmel	27/9/2017	400	Mesophotic	Ircinia variabilis	Echinodermata	Ophiuridae	Amphilepidida	Ophiotrichidae	Ophiactis	savignyi	30	Deposit feeder
Ircinia variabilis 2 from Rosh Carmel 27/9/2017 120m	Haifa –Rosh Carmel	27/9/2017	400	Mesophotic	Ircinia variabilis	Annelida	Polychaeta	Phyllodocida	Syllidae	Syllis	sp.	1	Carnivore
Ircinia variabilis 2 from Rosh Carmel 27/9/2017 120m	Haifa –Rosh Carmel	27/9/2017	400	Mesophotic	Ircinia variabilis	Annelida	Polychaeta	Phyllodocida	Nereididae	Ceratonereis (Composetia)	costae	3	Omnivore
Ircinia variabilis 2 from Rosh Carmel 27/9/2017 120m	Haifa –Rosh Carmel	27/9/2017	400	Mesophotic	Ircinia variabilis	Annelida	Polychaeta	Phyllodocida	Nereididae	Ceratonereis (Composetia)	costae	3	Omnivore
Ircinia variabilis 2 from Rosh Carmel 27/9/2017 120m	Haifa –Rosh Carmel	27/9/2017	400	Mesophotic	Ircinia variabilis	Annelida	Polychaeta	Terebellida	terebellidae	unident.	unident.	1	Deposit feeder
Ircinia variabilis 2 from sedot yam 30m 24/4/18	Sedot Yam	24/4/18	320	Shallow	Ircinia variabilis	Arthropoda	Malacostraca	decapoda	Alpheidae	Synalpheus	gambaralloides	6	Omnivore
Ircinia variabilis 2 from sedot yam 30m 24/4/18	Sedot Yam	24/4/18	320	Shallow	Ircinia variabilis	Annelida	Polychaeta	Phyllodocida	Nereididae	Leonnates	indicus	3	Omnivore
Ircinia variabilis 2 from sedot yam 30m 24/4/18	Sedot Yam	24/4/18	320	Shallow	Ircinia variabilis	Annelida	Polychaeta	Terebellida	terebellidae	Amaeana	trilobata	1	Deposit feeder
Ircinia variabilis 2 from sedot yam 30m 24/4/18	Sedot Yam	24/4/18	320	Shallow	Ircinia variabilis	Annelida	Polychaeta	Phyllodocida	spionidae	Prionospio	sp.	1	Deposit feeder
Ircinia variabilis 25492	Herzeliya	na	600	Mesophotic	Ircinia variabilis	Echinodermata	Ophiuridae	Amphilepidida	Ophiotrichidae	Ophiactis	savignyi	1	Deposit feeder
Ircinia variabilis from Achziv 2m 19/6/2017	Rosh Hanikra	19/6/17	520	Shallow	Ircinia variabilis	Arthropoda	Malacostraca	decapoda	alpheidae	Synalpheus	gambaralloides	32	Omnivore
Ircinia variabilis from Achziv 2m 19/6/2017	Rosh Hanikra	19/6/17	520	Shallow	Ircinia variabilis	Annelida	Polychaeta	Eunicida	Eunicidae	unident.	unident.	1	Carnivore
Ircinia variabilis from Sedot Yam 13/6/2017	Sedot Yam	13/6/17	400	Shallow	Ircinia variabilis	Echinodermata	Ophiuridae	Amphilepidida	Ophiotrichidae	Ophiactis	savignyi	2	Deposit feeder
Ircinia variabilis from Sedot Yam 13/6/2017	Sedot Yam	13/6/17	400	Shallow	Ircinia variabilis	Annelida	Polychaeta	Phyllodocida	Nereididae	Leonnates	indicus	1	Omnivore
Ircinia variabilis from Sedot Yam 13/6/2017	Sedot Yam	13/6/17	400	Shallow	Ircinia variabilis	Annelida	Polychaeta	Phyllodocida	Phylodocidae	unident.	unident.	1	Carnivore
Ircinia variabilis from Sedot Yam 13/6/2017	Sedot Yam	13/6/17	400	Shallow	Ircinia variabilis	Annelida	Polychaeta	Terebellida	terebellidae	unident.	unident.	1	Deposit feeder
Ircinia variabilis from Sedot Yam 13/6/2017	Sedot Yam	13/6/17	400	Shallow	Ircinia variabilis	Arthropoda	Malacostraca	decapoda	Alpheidae	Synalpheus	gambaralloides	4	Omnivore
Ircinia variabilis from Sedot Yam 13/6/2017	Sedot Yam	13/6/17	400	Shallow	Ircinia variabilis	Mollusca	Bivalves	Arcida	Noetiidae	Striarca	lactea	4	Filter feeder
Ircinia variabilis from Sedot Yam 13/6/2017	Sedot Yam	13/6/17	400	Shallow	Ircinia variabilis	Annelida	Sipuncula	unident.	unident.	unident.	unident.	1	Deposit feeder
Ircinia variabilis from Sedot Yam 13/6/2017	Sedot Yam	13/6/17	400	Shallow	Ircinia variabilis	Annelida	Polychaeta	Phyllodocida	Nereididae	Leonnates	indicus	1	Omnivore
Ircinia variabilis from Sedot Yam 13/6/2017	Sedot Yam	13/6/17	400	Shallow	Ircinia variabilis	Annelida	Polychaeta	Phyllodocida	Nereididae	Leonnates	indicus	1	Omnivore
Ircinia variabilis from Sedot Yam 13/6/2017	Sedot Yam	13/6/17	400	Shallow	Ircinia variabilis	Echinodermata	Ophiuridae	Amphilepidida	Ophiotrichidae	Ophiactis	savignyi	3	Deposit feeder
Ircinia variabilis from Sedot Yam 13/6/2017	Sedot Yam	13/6/17	400	Shallow	Ircinia variabilis	Annelida	Polychaeta	Phyllodocida	Syllidae	Trypanosyllis	zebra	1	Carnivore
Ircinia variabilis from Sedot Yam 13/6/2017	Sedot Yam	13/6/17	400	Shallow	Ircinia variabilis	Annelida	Polychaeta	Polychaeta	Chrysopetalidae	Chrysopetalum	cf. debile	1	Carnivore
Ircinia variabilis from Sedot Yam 13/6/2017	Sedot Yam	13/6/17	400	Shallow	Ircinia variabilis	Annelida	Polychaeta	Aphroditoidea	Polynoidae	Subadyte	pellucida	1	Carnivore
Ircinia variabilis from sedot yam 30m 24/4/18	Sedot Yam	24/4/18	300	Shallow	Ircinia variabilis	Arthropoda	Malacostraca	decapoda	Alpheidae	Synalpheus	gambaralloides	9	Omnivore
Ircinia variabilis from sedot yam 30m 24/4/18	Sedot Yam	24/4/18	300	Shallow	Ircinia variabilis	Annelida	Polychaeta	Phyllodocida	Nereididae	Leonnates	indicus	1	Omnivore
Ircinia variabilis from Sedot Yam 31/01/2018	Sedot Yam	31/1/2018	450	Shallow	Ircinia variabilis	Arthropoda	Malacostraca	decapoda	Alpheidae	Synalpheus	gambaralloides	4	Omnivore
Ircinia variabilis from Sedot Yam 31/01/2018	Sedot Yam	31/1/2018	450	Shallow	Ircinia variabilis	Arthropoda	Malacostraca	decapoda	Alpheidae	Synalpheus	gambaralloides	4	Omnivore
Ircinia variabilis from Sedot Yam 31/01/2018	Sedot Yam	31/1/2018	450	Shallow	Ircinia variabilis	Arthropoda	Malacostraca	decapoda	Alpheidae	Synalpheus	gambaralloides	6	Omnivore
Ircinia variabilis from Sedot Yam 31/01/2018	Sedot Yam	31/1/2018	450	Shallow	Ircinia variabilis	Annelida	Polychaeta	Polychaeta	Syllidae	Syllis	sp.	1	Carnivore
Ircinia variabilis from Sedot Yam 31/01/2018	Sedot Yam	31/1/2018	450	Shallow	Ircinia variabilis	Annelida	Polychaeta	Polychaeta	Nereididae	Ceratonereis (Composetia)	costae	1	Omnivore
Ircinia variabilis from Sedot Yam 31/01/2018	Sedot Yam	31/1/2018	450	Shallow	Ircinia variabilis	Annelida	Polychaeta	Polychaeta	Nereididae	Leonnates	indicus	1	Omnivore
Sarcotragus 2 from Sedot yam 22/5/18	Sedot Yam	22/5/18	400	Shallow	Sarcotragus spinosulus	Annelida	Polychaeta	Terebellida	terebellidae	Amaeana	trilobata	1	Deposit feeder
Sarcotragus 2 from Sedot yam 22/5/18	Sedot Yam	22/5/18	400	Shallow	Sarcotragus spinosulus	Annelida	Sipuncula	unident.	unident.	unident.	unident.	1	Deposit feeder
Sarcotragus 2 from Sedot yam 22/5/18	Sedot Yam	22/5/18	400	Shallow	Sarcotragus spinosulus	Annelida	Polychaeta	Aphroditoidea	Polynoidae	Eunoe	tuerkayi	1	Carnivore
Sarcotragus 2 from Sedot yam 22/5/18	Sedot Yam	22/5/18	400	Shallow	Sarcotragus spinosulus	Annelida	Polychaeta	Phyllodocida	Nereididae	Ceratonereis (Composetia)	costae	1	Omnivore
Sarcotragus 26095 from Haifa Bay 22m	Herzeliya	2016-05-01	n/a	Shallow	Sarcotragus foetidus	Echinodermata	Ophiuridae	Amphilepidida	Ophiotrichidae	Ophiactis	savignyi	29	Deposit feeder
Sarcotragus From Achziv 1m 20/6/2017	Rosh Hanikra	20/6/17	650	Shallow	Sarcotragus spinosulus	Arthropoda	Insecta	Insecta	Chironomidae	unident.	unident.	2	Deposit feeder
Sarcotragus from sedot yam 22/5/18 33m	Sedot Yam	22/5/18	450	Shallow	Sarcotragus spinosulus	Annelida	Polychaeta	Phyllodocida	Nereididae	Leonnates	indicus	6	Omnivore
Sarcotragus from sedot yam 22/5/18 33m	Sedot Yam	22/5/18	450	Shallow	Sarcotragus spinosulus	Annelida	Polychaeta	Aphroditoidea	Polynoidae	Eunoe	tuerkayi	6	Carnivore
Sarcotragus from sedot yam 22/5/18 33m	Sedot Yam	22/5/18	450	Shallow	Sarcotragus spinosulus	Echinodermata	Ophiuridae	Amphilepidida	Ophiotrichidae	Ophiactis	savignyi	123	Deposit feeder
Sarcotragus Sdot Yam May 2017	Sedot Yam	2017-05-01	n/a	Shallow	Sarcotragus foetidus	Annelida	Polychaeta	Phyllodocida	Nereididae	Ceratonereis (Composetia)	costae	1	Omnivore
Sarcotragus Sdot Yam May 2017	Sedot Yam	2017-05-01	n/a	Shallow	Sarcotragus foetidus	Annelida	Polychaeta	Phyllodocida	Nereididae	Leonnates	indicus	1	Omnivore
Sarcotragus Sdot Yam May 2017	Sedot Yam	2017-05-01	n/a	Shallow	Sarcotragus foetidus	Arthropoda	Malacostraca	decapoda	Alpheidae	Synalpheus	gambaralloides	3	Omnivore
Sarcotragus Sdot Yam May 2017	Sedot Yam	2017-05-01	n/a	Shallow	Sarcotragus foetidus	Echinodermata	Ophiuridae	Amphilepidida	Ophiotrichidae	Ophiactis	savignyi	50	Deposit feeder
Sarcotragus spinosulus from Herzeliya 19m	Herzeliya	14/8/2017	325	Shallow	Sarcotragus spinosulus	Annelida	Polychaeta	Phyllodocida	Nereididae	Leonnates	indicus	2	Omnivore
Sarcotragus spinosulus from Herzeliya 19m	Herzeliya	14/8/2017	325	Shallow	Sarcotragus spinosulus	Echinodermata	Ophiuridae	Amphilepidida	Ophiotrichidae	Ophiactis	savignyi	20	Deposit feeder
Sarcotragus spinosulus from Herzeliya 19m	Herzeliya	14/8/2017	325	Shallow	Sarcotragus spinosulus	Echinodermata	Ophiuridae	Amphilepidida	Ophiotrichidae	Ophiactis	savignyi	44	Deposit feeder
Sarcotragus spinosulus from sedot yam 30m 24/4/18	Sedot Yam	24/4/18	350	Shallow	Sarcotragus spinosulus	Annelida	Polychaeta	Phyllodocida	Nereididae	Leonnates	indicus	7	Omnivore
Sarcotragus spinosulus from sedot yam 30m 24/4/18	Sedot Yam	24/4/18	350	Shallow	Sarcotragus spinosulus	Arthropoda	Malacostraca	decapoda	Alpheidae	Synalpheus	gambaralloides	4	Omnivore
Sarctoragus #2 from Achziv 1m 20/6/17	Rosh Hanikra	20/6/2017	440	Shallow	Sarcotragus spinosulus	Annelida	Polychaeta	Phyllodocida	Nereididae	Ceratonereis (Composetia)	costae	2	Omnivore
Sarctoragus #2 from Achziv 1m 20/6/17	Rosh Hanikra	20/6/2017	440	Shallow	Sarcotragus spinosulus	Annelida	Polychaeta	Sabellida	Sabellidae	Branchiomma	sp.	3	Filter feeder
Sarctoragus #2 from Achziv 1m 20/6/17	Rosh Hanikra	20/6/2017	440	Shallow	Sarcotragus spinosulus	Annelida	Polychaeta	Phyllodocida	Syllidae	Branchiosyllis	exilis	1	Carnivore
Sarctoragus #2 from Achziv 1m 20/6/17	Rosh Hanikra	20/6/2017	440	Shallow	Sarcotragus spinosulus	Annelida	Polychaeta	Phyllodocida	Nereididae	Ceratonereis (Composetia)	costae	4	Omnivore
Sarctoragus #2 from Achziv 1m 20/6/17	Rosh Hanikra	20/6/2017	440	Shallow	Sarcotragus spinosulus	Annelida	Polychaeta	Phyllodocida	Syllidae	Syllis	sp.	1	Carnivore
Sarctoragus #2 from Achziv 1m 20/6/17	Rosh Hanikra	20/6/2017	440	Shallow	Sarcotragus spinosulus	Annelida	Polychaeta	Phyllodocida	Syllidae	Branchiosyllis	exilis	3	Carnivore
Spongia (lamelana?) 30 from Herzeliya 110m 4/7/2017	Herzeliya	2017-04-07	5500	Mesophotic	Spongia lamella	Annelida	Polychaeta	Phyllodocida	Nereididae	Ceratonereis (Composetia)	costae	7	Omnivore
Spongia (lamelana?) 30 from Herzeliya 110m 4/7/2017	Herzeliya	2017-04-07	5500	Mesophotic	Spongia lamella	Arthropoda	Malacostraca	decapoda	Pulminidae	Pilumnus	spinifer	2	Omnivore
Spongia (lamelana?) 30 from Herzeliya 110m 4/7/2017	Herzeliya	2017-04-07	5500	Mesophotic	Spongia lamella	Arthropoda	Malacostraca	decapoda	Pulminidae	Pilumnus	spinifer	1	Omnivore
Spongia (lamelana?) 30 from Herzeliya 110m 4/7/2017	Herzeliya	2017-04-07	5500	Mesophotic	Spongia lamella	Echinodermata	Ophiuridae	Amphilepidida	Ophiotrichidae	Ophiactis	savignyi	200	Deposit feeder
Spongia 16 from rosh Carmel 27/09/2017 82m	Haifa –Rosh Carmel	27/09/2017	2390	Mesophotic	Spongia lamella	Arthropoda	Isopoda	Gnathiidae	Gnathiidae	unident.	unident.	1	Omnivore
Spongia 16 from rosh Carmel 27/09/2017 82m	Haifa –Rosh Carmel	27/09/2017	2390	Mesophotic	Spongia lamella	Echinodermata	Ophiuridae	Amphilepidida	Ophiotrichidae	Ophiactis	savignyi	50	Deposit feeder
Spongia 16 from rosh Carmel 27/09/2017 82m	Haifa –Rosh Carmel	27/09/2017	2390	Mesophotic	Spongia lamella	Annelida	Polychaeta	Phyllodocida	Nereididae	Ceratonereis (Composetia)	costae	1	Omnivore
Spongia 16 from rosh Carmel 27/09/2017 82m	Haifa –Rosh Carmel	27/09/2017	2390	Mesophotic	Spongia lamella	Arthropoda	Malacostraca	decapoda	Pilumnidae	Pilumnus	spinifer	1	Omnivore
Spongia 16 from rosh Carmel 27/09/2017 82m	Haifa –Rosh Carmel	27/09/2017	2390	Mesophotic	Spongia lamella	Annelida	Polychaeta	Sabellida	Sabellidae	Parasabella	tommasi	1	Filter feeder
Spongia 16 from rosh Carmel 27/09/2017 82m	Haifa –Rosh Carmel	27/09/2017	2390	Mesophotic	Spongia lamella	Echinodermata	Ophiuridae	unident.	unident.	unident.	unident.	2	Deposit feeder
Spongia 25999	Herzeliya	23/3/16	2500	Mesophotic	Spongia nitens	Annelida	Polychaeta	Phyllodocida	Nereididae	Ceratonereis (Composetia)	costae	1	Omnivore
Spongia 25999	Herzeliya	23/3/16	2500	Mesophotic	Spongia nitens	Annelida	Polychaeta	Phyllodocida	Nereididae	Ceratonereis (Composetia)	costae	1	Omnivore
Spongia 25999	Herzeliya	23/3/16	2500	Mesophotic	Spongia nitens	Annelida	Polychaeta	Phyllodocida	Nereididae	Ceratonereis (Composetia)	costae	1	Omnivore
Spongia 25999	Herzeliya	23/3/16	2500	Mesophotic	Spongia nitens	Annelida	Polychaeta	Phyllodocida	Nereididae	Ceratonereis (Composetia)	costae	1	Omnivore
Spongia 25999	Herzeliya	23/3/16	2500	Mesophotic	Spongia nitens	Annelida	Polychaeta	Phyllodocida	Nereididae	Ceratonereis (Composetia)	costae	1	Omnivore
Spongia 25999	Herzeliya	23/3/16	2500	Mesophotic	Spongia nitens	Annelida	Polychaeta	Phyllodocida	Nereididae	Ceratonereis (Composetia)	costae	1	Omnivore
Spongia from Herzelia 120m 17/1/17	Herzeliya	17/1/17	n/a	Mesophotic	Spongia nitens	Annelida	Polychaeta	Phyllodocida	Syllidae	Haplosyllis	spongicola	1	Carnivore
Spongia from Herzelia 120m 17/1/17	Herzeliya	17/1/17	n/a	Mesophotic	Spongia nitens	Mollusca	Bivalves	Myida	Myidae	Sphenia	binghami	1	Filter feeder
Spongia from Herzelia 120m 17/1/17	Herzeliya	17/1/17	n/a	Mesophotic	Spongia nitens	Mollusca	Bivalves	Mytilida	Mytilidae	Gregariella	petagnae	1	Filter feeder
Spongia from Herzelia 120m 17/1/17	Herzeliya	17/1/17	n/a	Mesophotic	Spongia nitens	Annelida	Polychaeta	Phyllodocida	Nereididae	Leonnates	indicus	1	Omnivore
Spongia from Herzelia 120m 17/1/17	Herzeliya	17/1/17	n/a	Mesophotic	Spongia nitens	Annelida	Polychaeta	Phyllodocida	Nereididae	Ceratonereis (Composetia)	costae	1	Omnivore
Spongia from Herzelia 120m 17/1/17	Herzeliya	17/1/17	n/a	Mesophotic	Spongia nitens	Echinodermata	Ophiuridae	unident.	unident.	unident.	unident.	6	Deposit feeder
Stryphnus 16 from herzeliya 18/4/17 26139	Herzeliya	18/4/17	790	Mesophotic	Stryphnus mucronatus	Echinodermata	Ophiuridae	Amphilepidida	Amphiuridae	Amphipholis	squamata	1	Deposit feeder
Stryphnus 16 from herzeliya 18/4/17 26139	Herzeliya	18/4/17	790	Mesophotic	Stryphnus mucronatus	Annelida	Polychaeta	Phyllodocida	Nereididae	Ceratonereis (Composetia)	costae	1	Omnivore
Stryphnus 21 from Herzeliya 19/4/17 26144	Herzeliya	19/4/17	10200	Mesophotic	Stryphnus mucronatus	Annelida	Polychaeta	Phyllodocida	Nereididae	Ceratonereis (Composetia)	costae	1	Omnivore
Stryphnus 21 from Herzeliya 19/4/17 26144	Herzeliya	19/4/17	10200	Mesophotic	Stryphnus mucronatus	Annelida	Polychaeta	Phyllodocida	Nereididae	Ceratonereis (Composetia)	costae	1	Omnivore
Stryphnus 21 from Herzeliya 19/4/17 26144	Herzeliya	19/4/17	10200	Mesophotic	Stryphnus mucronatus	Annelida	Polychaeta	Phyllodocida	Nereididae	Ceratonereis (Composetia)	costae	1	Omnivore
Stryphnus 21 from Herzeliya 19/4/17 26144	Herzeliya	19/4/17	10200	Mesophotic	Stryphnus mucronatus	Annelida	Polychaeta	Phyllodocida	Nereididae	Ceratonereis (Composetia)	costae	1	Omnivore
Stryphnus 21 from Herzeliya 19/4/17 26144	Herzeliya	19/4/17	10200	Mesophotic	Stryphnus mucronatus	Annelida	Polychaeta	Phyllodocida	Nereididae	Ceratonereis (Composetia)	costae	1	Omnivore
Stryphnus 21 from Herzeliya 19/4/17 26144	Herzeliya	19/4/17	10200	Mesophotic	Stryphnus mucronatus	Annelida	Polychaeta	Phyllodocida	Nereididae	Ceratonereis (Composetia)	costae	1	Omnivore
Stryphnus 21 from Herzeliya 19/4/17 26144	Herzeliya	19/4/17	10200	Mesophotic	Stryphnus mucronatus	Annelida	Polychaeta	Phyllodocida	Nereididae	Ceratonereis (Composetia)	costae	1	Omnivore
Stryphnus 21 from Herzeliya 19/4/17 26144	Herzeliya	19/4/17	10200	Mesophotic	Stryphnus mucronatus	Annelida	Polychaeta	Phyllodocida	Nereididae	Ceratonereis (Composetia)	costae	1	Omnivore
Stryphnus 21 from Herzeliya 19/4/17 26144	Herzeliya	19/4/17	10200	Mesophotic	Stryphnus mucronatus	Annelida	Polychaeta	Phyllodocida	Nereididae	Ceratonereis (Composetia)	costae	7	Omnivore
Stryphnus 21 from Herzeliya 19/4/17 26144	Herzeliya	19/4/17	10200	Mesophotic	Stryphnus mucronatus	Annelida	Polychaeta	Phyllodocida	Nereididae	Ceratonereis (Composetia)	costae	1	Omnivore
Stryphnus 21 from Herzeliya 19/4/17 26144	Herzeliya	19/4/17	10200	Mesophotic	Stryphnus mucronatus	Annelida	Polychaeta	Phyllodocida	Lumbrineridae	Lumbrineris	sp.	1	Carnivore
Stryphnus 21 from Herzeliya 19/4/17 26144	Herzeliya	19/4/17	10200	Mesophotic	Stryphnus mucronatus	Annelida	Polychaeta	Phyllodocida	Nereididae	Ceratonereis (Composetia)	costae	1	Omnivore
Stryphnus 21 from Herzeliya 19/4/17 26144	Herzeliya	19/4/17	10200	Mesophotic	Stryphnus mucronatus	Annelida	Polychaeta	Phyllodocida	Nereididae	Ceratonereis (Composetia)	costae	3	Omnivore
Stryphnus 21 from Herzeliya 19/4/17 26144	Herzeliya	19/4/17	10200	Mesophotic	Stryphnus mucronatus	Annelida	Polychaeta	Phyllodocida	Nereididae	Ceratonereis (Composetia)	costae	1	Omnivore
Stryphnus 21 from Herzeliya 19/4/17 26144	Herzeliya	19/4/17	10200	Mesophotic	Stryphnus mucronatus	Annelida	Polychaeta	Phyllodocida	Nereididae	Ceratonereis (Composetia)	costae	6	Omnivore
Stryphnus 21 from Herzeliya 19/4/17 26144	Herzeliya	19/4/17	10200	Mesophotic	Stryphnus mucronatus	Annelida	Polychaeta	Phyllodocida	Nereididae	Ceratonereis (Composetia)	costae	1	Omnivore
Stryphnus 21 from Herzeliya 19/4/17 26144	Herzeliya	19/4/17	10200	Mesophotic	Stryphnus mucronatus	Annelida	Polychaeta	Phyllodocida	Nereididae	Ceratonereis (Composetia)	costae	1	Omnivore
Stryphnus 21 from Herzeliya 19/4/17 26144	Herzeliya	19/4/17	10200	Mesophotic	Stryphnus mucronatus	Annelida	Polychaeta	Phyllodocida	Nereididae	Ceratonereis (Composetia)	costae	1	Omnivore
Stryphnus 21 from Herzeliya 19/4/17 26144	Herzeliya	19/4/17	10200	Mesophotic	Stryphnus mucronatus	Annelida	Polychaeta	Phyllodocida	Polynoidae	Subadyte	pellucida	1	Carnivore
Stryphnus 21 from Herzeliya 19/4/17 26144	Herzeliya	19/4/17	10200	Mesophotic	Stryphnus mucronatus	Annelida	Polychaeta	Terebellida	terebellidae	Amaeana	trilobata	1	Deposit feeder
Stryphnus 21 from Herzeliya 19/4/17 26144	Herzeliya	19/4/17	10200	Mesophotic	Stryphnus mucronatus	Annelida	Polychaeta	Terebellida	terebellidae	Amaeana	trilobata	1	Deposit feeder
Stryphnus 21 from Herzeliya 19/4/17 26144	Herzeliya	19/4/17	10200	Mesophotic	Stryphnus mucronatus	Annelida	Polychaeta	Phyllodocida	Lumbrineridae	unident.	unident.	2	Carnivore
Stryphnus 25 from Herzeliya 110m 4/7/2017	Herzeliya	2017-04-07	1700	Mesophotic	Stryphnus mucronatus	Arthropoda	Malacostraca	decapoda	unident.	Caridea	sp.	1	Omnivore
Stryphnus 25 from Herzeliya 110m 4/7/2017	Herzeliya	2017-04-07	1700	Mesophotic	Stryphnus mucronatus	Annelida	Polychaeta	Terebellida	terebellidae	unident.	unident.	1	Deposit feeder
Stryphnus 25 from Herzeliya 110m 4/7/2017	Herzeliya	2017-04-07	1700	Mesophotic	Stryphnus mucronatus	Annelida	Polychaeta	Sabellida	Sabellidae	unident.	unident.	1	Filter feeder
Stryphnus 25 from Herzeliya 110m 4/7/2017	Herzeliya	2017-04-07	1700	Mesophotic	Stryphnus mucronatus	Echinodermata	Ophiuridae	Amphilepidida	Ophiotrichidae	Ophiactis	savignyi	2	Deposit feeder
Stryphnus 25 from Herzeliya 110m 4/7/2017	Herzeliya	2017-04-07	1700	Mesophotic	Stryphnus mucronatus	Annelida	Polychaeta	Aphroditoidea	Polynoidae	Eunoe	tuerkayi	1	Carnivore
Stryphnus 25 from Herzeliya 110m 4/7/2017	Herzeliya	2017-04-07	1700	Mesophotic	Stryphnus mucronatus	Arthropoda	Malacostraca	decapoda	Thoridae	Thoridae	sp.	1	Omnivore
Stryphnus 26010	Herzeliya	23/3/16	5500	Mesophotic	Stryphnus mucronatus	Annelida	Polychaeta	Phyllodocida	Nereididae	Ceratonereis (Composetia)	costae	1	Omnivore
Stryphnus 26010	Herzeliya	23/3/16	5500	Mesophotic	Stryphnus mucronatus	Echinodermata	Ophiuridae	Amphilepidida	Ophiotrichidae	Ophiactis	savignyi	2	Deposit feeder
Stryphnus 26021 9/3/16	Herzeliya	2016-09-03	11000	Mesophotic	Stryphnus mucronatus	Annelida	Polychaeta	Phyllodocida	Nereididae	Ceratonereis (Composetia)	costae	1	Omnivore
Stryphnus 26021 9/3/16	Herzeliya	2016-09-03	11000	Mesophotic	Stryphnus mucronatus	Arthropoda	Malacostraca	decapoda	Pilumnidae	Pilumnus	spinifer	1	Omnivore
Stryphnus 26021 9/3/16	Herzeliya	2016-09-03	11000	Mesophotic	Stryphnus mucronatus	Arthropoda	Malacostraca	decapoda	unident.	Caridea	sp.	2	Omnivore
Stryphnus 3 from Herzeliya 18/4/17 26125	Herzeliya	18/4/17	3778	Mesophotic	Stryphnus mucronatus	Annelida	Polychaeta	Phyllodocida	Glyceridae	Glycera	sp.	1	Carnivore
Stryphnus 3 from Herzeliya 18/4/17 26125	Herzeliya	18/4/17	3778	Mesophotic	Stryphnus mucronatus	Annelida	Polychaeta	Phyllodocida	Syllidae	Syllis	gracilis	2	Omnivore
Stryphnus 3 from Herzeliya 18/4/17 26125	Herzeliya	18/4/17	3778	Mesophotic	Stryphnus mucronatus	Annelida	Polychaeta	Phyllodocida	Nereididae	Ceratonereis (Composetia)	costae	5	Omnivore
Stryphnus 3 from Herzeliya 18/4/17 26125	Herzeliya	18/4/17	3778	Mesophotic	Stryphnus mucronatus	Annelida	Polychaeta	Phyllodocida	Nereididae	Ceratonereis (Composetia)	costae	1	Omnivore
Stryphnus 3 from Herzeliya 18/4/17 26125	Herzeliya	18/4/17	3778	Mesophotic	Stryphnus mucronatus	Echinodermata	Ophiuridae	Amphilepidida	Ophiotrichidae	Ophiactis	savignyi	3	Deposit feeder
Stryphnus 3 from Herzeliya 18/4/17 26125	Herzeliya	18/4/17	3778	Mesophotic	Stryphnus mucronatus	Arthropoda	Malacostraca	Decapoda	Thoridae	Eualus	cranchii	1	Omnivore
Stryphnus 3 from Herzeliya 18/4/17 26125	Herzeliya	18/4/17	3778	Mesophotic	Stryphnus mucronatus	Annelida	Polychaeta	Phyllodocida	Nereididae	Ceratonereis (Composetia)	costae	1	Omnivore
Stryphnus 3 from Herzeliya 18/4/17 26125	Herzeliya	18/4/17	3778	Mesophotic	Stryphnus mucronatus	Annelida	Polychaeta	Phyllodocida	Nereididae	Ceratonereis (Composetia)	costae	1	Omnivore
Stryphnus 3 from Herzeliya 18/4/17 26125	Herzeliya	18/4/17	3778	Mesophotic	Stryphnus mucronatus	Annelida	Polychaeta	Phyllodocida	Nereididae	Ceratonereis (Composetia)	costae	1	Omnivore
Stryphnus 3 from Herzeliya 18/4/17 26125	Herzeliya	18/4/17	3778	Mesophotic	Stryphnus mucronatus	Annelida	Polychaeta	Phyllodocida	Nereididae	Ceratonereis (Composetia)	costae	1	Omnivore
Stryphnus 3 from Herzeliya 18/4/17 26125	Herzeliya	18/4/17	3778	Mesophotic	Stryphnus mucronatus	Annelida	Polychaeta	Phyllodocida	Nereididae	Ceratonereis (Composetia)	costae	1	Omnivore
Stryphnus 3 from Herzeliya 18/4/17 26125	Herzeliya	18/4/17	3778	Mesophotic	Stryphnus mucronatus	Annelida	Polychaeta	Aphroditoidea	Polynoidae	Eunoe	tuerkayi	1	Carnivore
Stryphnus 3 from Herzeliya 27/2/17 26119	Herzeliya	27/2/17	490	Mesophotic	Stryphnus mucronatus	Annelida	Polychaeta	Phyllodocida	Nereididae	Ceratonereis (Composetia)	costae	1	Omnivore
Stryphnus 3 from Herzeliya 27/2/17 26119	Herzeliya	27/2/17	490	Mesophotic	Stryphnus mucronatus	Mollusca	Bivalves	Myida	Myidae	Sphenia	binghami	1	Filter feeder
Stryphnus 3 from Herzeliya 27/2/17 26119	Herzeliya	27/2/17	490	Mesophotic	Stryphnus mucronatus	Annelida	Polychaeta	Phyllodocida	Syllidae	Syllis	sp.	1	Carnivore
Stryphnus 3 from Herzeliya 27/2/17 26119	Herzeliya	27/2/17	490	Mesophotic	Stryphnus mucronatus	Annelida	Polychaeta	Phyllodocida	Polynoidae	Subadyte	pellucida	1	Carnivore
Stryphnus 31 from Herzeliya 19/4/17 26154	Herzeliya	19/4/17	680	Mesophotic	Stryphnus mucronatus	Annelida	Polychaeta	Aphroditoidea	Polynoidae	Subadyte	pellucida	1	Carnivore
Stryphnus 31 from Herzeliya 19/4/17 26154 -4	Herzeliya	19/4/17	10200	Mesophotic	Stryphnus mucronatus	Annelida	Polychaeta	Terebellida	terebellidae	unident.	unident.	1	Deposit feeder
Stryphnus 31 from Herzeliya 19/4/17 26154	Herzeliya	19/4/17	680	Mesophotic	Stryphnus mucronatus	Echinodermata	Ophiuridae	Amphilepidida	Ophiotrichidae	Ophiactis	savignyi	1	Deposit feeder
Stryphnus 31 from Herzeliya 19/4/17 26154	Herzeliya	19/4/17	680	Mesophotic	Stryphnus mucronatus	Echinodermata	Ophiuridae	Amphilepidida	Ophiotrichidae	Ophiactis	savignyi	1	Deposit feeder
Stryphnus 31 from Herzeliya 19/4/17 26154	Herzeliya	19/4/17	680	Mesophotic	Stryphnus mucronatus	Mollusca	Gastropod	Neogastropoda	Columbellidae	Mitrella	coccinea	1	Carnivore
Stryphnus 35 from herzeliya 19/4/17 26158	Herzeliya	19/4/17	1700	Mesophotic	Stryphnus mucronatus	Annelida	Polychaeta	Terebellida	terebellidae	unident.	unident.	1	Deposit feeder
Stryphnus 35 from herzeliya 19/4/17 26158	Herzeliya	19/4/17	1700	Mesophotic	Stryphnus mucronatus	Arthropoda	Malacostraca	decapoda	unident.	Caridea	sp. 2	1	Omnivore
Thymosiopsis 9 from Rosh Carmel 27/09/2017	Haifa –Rosh Carmel	27/09/2017	2620	Mesophotic	Thymosiopsis conglomerans	Arthropoda	Malacostraca	decapoda	Alpheidae	Alpheus	sp.	3	Deposit feeder
Thymosiopsis 9 from Rosh Carmel 27/09/2017	Haifa –Rosh Carmel	27/09/2017	2620	Mesophotic	Thymosiopsis conglomerans	Arthropoda	Malacostraca	decapoda	Pilumnidae	Pilumnus	spinifer	1	Omnivore
Thymosiopsis 9 from Rosh Carmel 27/09/2017	Haifa –Rosh Carmel	27/09/2017	2620	Mesophotic	Thymosiopsis conglomerans	Annelida	Polychaeta	Phyllodocida	Nereididae	Ceratonereis (Composetia)	costae	1	Omnivore
Thymosiopsis 9 from Rosh Carmel 27/09/2017	Haifa –Rosh Carmel	27/09/2017	2620	Mesophotic	Thymosiopsis conglomerans	Arthropoda	Malacostraca	decapoda	Majidae	Eurynome	aspera	1	Omnivore
Thymosiopsis 9 from Rosh Carmel 27/09/2017	Haifa –Rosh Carmel	27/09/2017	2620	Mesophotic	Thymosiopsis conglomerans	Annelida	Polychaeta	Phyllodocida	Dorvillediae	Dorvillea	sp.	1	Omnivore
Thymosiopsis 9 from Rosh Carmel 27/09/2017	Haifa –Rosh Carmel	27/09/2017	2620	Mesophotic	Thymosiopsis conglomerans	Mollusca	Gastropod	Neogastropoda	Muricidae	Muricopsis	cristata	2	Carnivore
Thymosiopsis 9 from Rosh Carmel 27/09/2017	Haifa –Rosh Carmel	27/09/2017	2620	Mesophotic	Thymosiopsis conglomerans	Annelida	Polychaeta	Sabellida	Sabellidae	Myxicola	sp.	5	Filter feeder
Thymosiopsis 9 from Rosh Carmel 27/09/2017	Haifa –Rosh Carmel	27/09/2017	2620	Mesophotic	Thymosiopsis conglomerans	Annelida	Sipuncula	unident.	unident.	unident.	unident.	1	Deposit feeder
Thymosiopsis 9 from Rosh Carmel 27/09/2017	Haifa –Rosh Carmel	27/09/2017	2620	Mesophotic	Thymosiopsis conglomerans	Annelida	Polychaeta	Phyllodocida	Polynoidae	Subadyte	pellucida	1	Carnivore
Thymosiopsis 9 from Rosh Carmel 27/09/2017	Haifa –Rosh Carmel	27/09/2017	2620	Mesophotic	Thymosiopsis conglomerans	Annelida	Polychaeta	Phyllodocida	Aphroditidae	Pontogenia	chrysocoma	1	Carnivore
Thymosiopsis 9 from Rosh Carmel 27/09/2017	Haifa –Rosh Carmel	27/09/2017	2620	Mesophotic	Thymosiopsis conglomerans	Annelida	Polychaeta	Sabellida	Sabellidae	Myxicola	sp.	1	Filter feeder
Thymosiopsis 9 from Rosh Carmel 27/09/2017	Haifa –Rosh Carmel	27/09/2017	2620	Mesophotic	Thymosiopsis conglomerans	Echinodermata	Ophiuridae	Amphilepidida	Amphiuridae	Amphipholis	squamata	1	Deposit feeder
Thymosiopsis 9 from Rosh Carmel 27/09/2017	Haifa –Rosh Carmel	27/09/2017	2620	Mesophotic	Thymosiopsis conglomerans	Annelida	Polychaeta	Phyllodocida	Hesionidae	Syllidia	aramta	1	Carnivore
Thymosiopsis 9 from Rosh Carmel 27/09/2017	Haifa –Rosh Carmel	27/09/2017	2620	Mesophotic	Thymosiopsis conglomerans	Echinodermata	Ophiuridae	Amphilepidida	Ophiotrichidae	Ophiactis	savignyi	3	Deposit feeder
Thymosiopsis 9 from Rosh Carmel 27/09/2017	Haifa –Rosh Carmel	27/09/2017	2620	Mesophotic	Thymosiopsis conglomerans	Echinodermata	Ophiuridae	Amphilepidida	Ophiotrichidae	Ophiothrix	quinquemaculata	2	Deposit feeder
Fasciospongia from Sedot Yam 23/5/2018 33m	Sedot Yam	23/5/2018	80	Shallow	Fasciospongia cavernosa	Annelida	Sipuncula	unident.	unident.	unident.	unident.	1	Deposit feeder
30/8/16 Herzeliya 105m from Stryphnus #28 26072	Herzeliya	30/8/16	1000	Mesophotic	Stryphnus mucronatus	Echinodermata	Ophiuridae	Amphilepidida	Ophiotrichidae	Ophiothrix	quinquemaculata	1	Deposit feeder
30/8/16 Herzeliya 105m from Stryphnus #28 26072	Herzeliya	30/8/16	1000	Mesophotic	Stryphnus mucronatus	Arthropoda	Malacostraca	decapoda	Alpheidae	Synalpheus	gambaralloides	2	Omnivore
Fasciospongia from Herzeliya 5/11/2018	Herzeliya	2018-05-11	350	Mesophotic	Fasciospongia cavernosa	Arthropoda	Malacostraca	decapoda	Alpheidae	Synalpheus	gambaralloides	21	Omnivore
Fasciospongia from Herzeliya 5/11/2018	Herzeliya	2018-05-11	350	Mesophotic	Fasciospongia cavernosa	Annelida	Polychaeta	Phyllodocida	Nereididae	Ceratonereis (Composetia)	costae	1	Omnivore
Fasciospongia from Herzeliya 5/11/2018	Herzeliya	2018-05-11	350	Mesophotic	Fasciospongia cavernosa	Annelida	Polychaeta	Phyllodocida	Syllidae	Syllis	sp.	1	Carnivore
Fasciospongia from Herzeliya 5/11/2018	Herzeliya	2018-05-11	350	Mesophotic	Fasciospongia cavernosa	Echinodermata	Ophiuridae	Amphilepidida	Ophiotrichidae	Ophiothrix	quinquemaculata	2	Deposit feeder
Fasciospongia from Herzeliya 5/11/2018	Herzeliya	2018-05-11	350	Mesophotic	Fasciospongia cavernosa	Annelida	Polychaeta	Sabellida	Sabellidae	Parasabella	tenuicollaris	1	Filter feeder
I. oros 25996 23/3/16 Herzeliya	Herzeliya	23/3/16	6750	Mesophotic	Ircinia oros	Annelida	Polychaeta	Phyllodocida	Nereididae	Ceratonereis (Composetia)	costae	1	Omnivore
Fasciospongia from sedot Yam 22/5/18	Sedot Yam	22/5/18	100	Shallow	Fasciospongia cavernosa	Annelida	Polychaeta	Phyllodocida	Syllidae	Exogone	sp.	1	Omnivore
Fasciospongia from sedot Yam 22/5/18	Sedot Yam	22/5/18	100	Shallow	Fasciospongia cavernosa	Annelida	Polychaeta	Aphroditoidea	Polynoidae	Eunoe	tuerkayi	1	Carnivore
Fasciospongia from sedot Yam 22/5/18	Sedot Yam	22/5/18	100	Shallow	Fasciospongia cavernosa	Annelida	Polychaeta	Aphroditoidea	Polynoidae	unident.	unident.	3	Carnivore
Fasciospongia from sedot Yam 22/5/18	Sedot Yam	22/5/18	100	Shallow	Fasciospongia cavernosa	Annelida	Polychaeta	Sabellida	Sabellidae	unident.	unident.	1	Filter feeder
Stryphnus 3 from Herzeliya 18/4/17 26125	Herzeliya	18/4/17	3778	Mesophotic	Stryphnus mucronatus	Mollusca	Gastropod	Neogastropoda	Columbellidae	Mitrella	coccinea	1	Carnivore
Stryphnus 31 from Herzeliya 19/4/17 26154 -4	Herzeliya	19/4/17	10200	Mesophotic	Stryphnus mucronatus	Annelida	Polychaeta	phylodocida	spionidae	unident.	unident.	1	Deposit feeder
Thymosiopsis from Shefayim 25/08/2019	Shefayim	25/08/19	n/a	Mesophotic	Thymosiopsis conglomerans	Annelida	Polychaeta	Eunicida	Lumbrineridae	Lumbrineris	latreilli	1	Carnivore
Thymosiopsis from Shefayim 25/08/2019	Shefayim	25/08/19	n/a	Mesophotic	Thymosiopsis conglomerans	Annelida	Polychaeta	Aphroditoidea	Polynoidae	Subadyte	pellucida	1	Carnivore
Thymosiopsis from Shefayim 25/08/2019	Shefayim	25/08/19	n/a	Mesophotic	Thymosiopsis conglomerans	Annelida	Polychaeta	Eunicida	Eunicidae	Palola	siciliensis	1	Carnivore
Thymosiopsis from Shefayim 25/08/2019	Shefayim	25/08/19	n/a	Mesophotic	Thymosiopsis conglomerans	Annelida	Polychaeta	Phyllodocida	Nereididae	Ceratonereis (Composetia)	costae	4	Omnivore
Thymosiopsis from Shefayim 25/08/2019	Shefayim	25/08/19	n/a	Mesophotic	Thymosiopsis conglomerans	Annelida	Polychaeta	Sabellida	Sabellidae	Parasabella	tenuicollaris	1	Filter feeder
30/8/16 Herzeliya 105m from Stryphnus #28 26072	Herzeliya	30/8/16	5300	Mesophotic	Stryphnus mucronatus	Echinodermata	Ophiuridae	Amphilepidida	Ophiotrichidae	Ophiothrix	quinquemaculata	1	Deposit feeder
I. variabilis 25918	Herzeliya	28/7/15	500	Mesophotic	Ircinia variabilis	Annelida	Polychaeta	Phyllodocida	Nereididae	Ceratonereis (Composetia)	costae	1	Omnivore
